# Supplementary material for: Incorporating a Women’s Cardiovascular Health Curriculum Into Medical Education
Source: PubMed Central journal article supplement — CJC Open. 2021 Sep 28;3(12 Suppl):S187–91. doi: 10.1016/j.cjco.2021.09.020 (PMC8712710; doi:10.1016/j.cjco.2021.09.020), 2021-09-28
Supplement: mmc1.pdf [file mmc1.pdf]

## Canadian Women's Heart Health Education Course – Module 1

### Participant Evaluation Form

Thank you for completing Module 2 (Acute Coronary Syndromes (ACS) in Women) of the Canadian Women's Heart Health Education Course. Please take a moment to complete this brief, feedback survey. Your comments are very important to us and will take less than 10 minutes to complete.

#### 1. Personal Information

First name: \_\_\_\_\_  
 Last name: \_\_\_\_\_  
 Email address: \_\_\_\_\_  
 City: \_\_\_\_\_  
 Province: \_\_\_\_\_  
 Country: \_\_\_\_\_

2. Name of institution (if applicable): \_\_\_\_\_

#### 3. Which category best describes you?

- Clinician
- Researcher
- Clinician scientist
- Trainee - clinician
- Trainee - researcher
- Person with lived experience
- Other (please specify): \_\_\_\_\_

#### 4. Specialty

- Emergency medicine
- General internal medicine
- Cardiology
- Other (please specify): \_\_\_\_\_

5. Years since graduation: \_\_\_\_\_

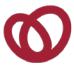

6. As this webinar was pre-recorded, do you have any content related questions that you would like to ask the presenter?

7. Please rate the quality of the activity on a scale of 1 (strongly disagree) to 5 (strongly agree).  
This activity:

|                                                    |   |   |   |   |   |     |
|----------------------------------------------------|---|---|---|---|---|-----|
| Met the stated learning objectives for this module | 1 | 2 | 3 | 4 | 5 | N/A |
| Met the overall learning objectives                | 1 | 2 | 3 | 4 | 5 | N/A |
| Enhanced my knowledge                              | 1 | 2 | 3 | 4 | 5 | N/A |
| Satisfied my expectations                          | 1 | 2 | 3 | 4 | 5 | N/A |
| Conveyed information that applied to my practice   | 1 | 2 | 3 | 4 | 5 | N/A |
| Was free from commercial bias?                     | 1 | 2 | 3 | 4 | 5 | N/A |

8. What did you learn or how will this webinar impact your practice?

9. Please indicate which CanMEDS role(s) you felt were addressed during this educational activity:

- |                                                 |                                          |                                       |
|-------------------------------------------------|------------------------------------------|---------------------------------------|
| <input type="checkbox"/> Medical Expert         | <input type="checkbox"/> Collaborator    | <input type="checkbox"/> Scholar      |
| <input type="checkbox"/> Family Medicine Expert | <input type="checkbox"/> Leader          | <input type="checkbox"/> Professional |
| <input type="checkbox"/> Communicator           | <input type="checkbox"/> Health Advocate |                                       |

10. What aspects of the webinar did you enjoy?

**11. What aspects of the session did you least enjoy? Why?**

**12. What changes would you recommend in order to make this webinar more impactful?**

**13. Were there any additional resources that would have been helpful to include in this webinar?**

**14. To what extent do you agree with the following statements about this webinar?**

1 = Strongly disagree 2 = Disagree 3 = Neutral 4 = Agree 5 = Strongly agree N/A = Don't know

|                                                                                                                |   |   |   |   |   |     |
|----------------------------------------------------------------------------------------------------------------|---|---|---|---|---|-----|
| I have a greater understanding of the emerging areas of women's cardiovascular research and clinical practice. | 1 | 2 | 3 | 4 | 5 | N/A |
|----------------------------------------------------------------------------------------------------------------|---|---|---|---|---|-----|

|                                                                                                                  |   |   |   |   |   |     |
|------------------------------------------------------------------------------------------------------------------|---|---|---|---|---|-----|
| I have increased my capacity to develop and disseminate strategies to improve cardiovascular health among women. | 1 | 2 | 3 | 4 | 5 | N/A |
|------------------------------------------------------------------------------------------------------------------|---|---|---|---|---|-----|

|                                                                            |   |   |   |   |   |     |
|----------------------------------------------------------------------------|---|---|---|---|---|-----|
| This webinar <u>did not</u> spark ideas for collaboration with colleagues. | 1 | 2 | 3 | 4 | 5 | N/A |
|----------------------------------------------------------------------------|---|---|---|---|---|-----|

**15. Additional comments**



**Presenter Evaluation**

16. Please rate the quality of the presentation of Dr. Carolyn Baer on a scale of 1 (poor) to 5 (excellent).

|                                 |   |   |   |   |   |     |
|---------------------------------|---|---|---|---|---|-----|
| Overall Presenter Effectiveness | 1 | 2 | 3 | 4 | 5 | N/A |
| Content Relevance               | 1 | 2 | 3 | 4 | 5 | N/A |
| Used Effective Teaching Methods | 1 | 2 | 3 | 4 | 5 | N/A |

**17. Additional Comments**

18. Please rate the quality of the presentation of Ms. Helena Van Ryn on a scale of 1 (poor) to 5 (excellent).

|                                 |   |   |   |   |   |     |
|---------------------------------|---|---|---|---|---|-----|
| Overall Presenter Effectiveness | 1 | 2 | 3 | 4 | 5 | N/A |
| Content Relevance               | 1 | 2 | 3 | 4 | 5 | N/A |
| Used Effective Teaching Methods | 1 | 2 | 3 | 4 | 5 | N/A |

**19. Additional Comments**

20. How did you hear about the Canadian Women’s Heart Health Education Course?

Thank you for your time. If you have any questions, please email us at [cwhhc@ottawaheart.ca](mailto:cwhhc@ottawaheart.ca).

*This event is an accredited Group Learning Activity (Section 1) as defined by the Maintenance of Certification Program of the Royal College of Physicians & Surgeons of Canada and approved by the Canadian Cardiovascular Society. You may claim a maximum of 7 hours.*
